# Supplementary material for: Andrographis paniculata ameliorates estrogen deficiency-related osteoporosis by directing bone marrow mesenchymal stem cell fate
Source: PubMed Central journal article supplement — Ann Transl Med. 2023 Jan 31;11(2):52. doi: 10.21037/atm-22-1121 (PMC9929840; doi:10.21037/atm-22-1121), 2023-01-31
Supplement: atm-11-02-52-dss.pdf [file atm-11-02-52-dss.pdf]

## Data Sharing Statement

|                     |                                                                                                                                                     |                                                            |
|---------------------|-----------------------------------------------------------------------------------------------------------------------------------------------------|------------------------------------------------------------|
| <b>Article Info</b> | <a href="https://dx.doi.org/10.21037/atm-22-1121">https://dx.doi.org/10.21037/atm-22-1121</a>                                                       |                                                            |
| <b>Item</b>         | <b>Question</b>                                                                                                                                     | <b>Authors' Response<br/>(place "-" if not applicable)</b> |
| 1                   | Would you like to share data collected for your study to others?                                                                                    | Yes.                                                       |
| 2                   | If not, would you like to share the reason for your decision?                                                                                       | -                                                          |
| 3                   | What data in particular will be shared?                                                                                                             | Raw data.                                                  |
| 4                   | Any other documents will be shared? Such as study protocol, statistical analysis plan, informed consent form, clinical study report, analytic code. | Yes. All protocols.                                        |
| 5                   | When will data availability begin?                                                                                                                  | From the publish.                                          |
| 6                   | When will data availability end?                                                                                                                    | No limitation.                                             |
| 7                   | To whom will you share the data?                                                                                                                    | Everyone.                                                  |
| 8                   | For what type of analysis or purpose?                                                                                                               | No limitation.                                             |
| 9                   | How or where can the data/documents be obtained?                                                                                                    | It can be obtained from the corresponding author.          |
| 10                  | Any other restrictions?                                                                                                                             | No.                                                        |
